# Supplementary material for: Ionizing radiation from Chernobyl affects development of wild carrot plants
Source: PubMed Central journal article supplement (PMC5159907; doi:10.1038/srep39282), 2016-12-16
Supplement: srep39282-s1.pdf [file srep39282-s1.pdf]

## **Ionizing radiation from Chernobyl affects development of wild carrot plants**

Zbyszek Boratyński<sup>1,2</sup>, Javi Miranda Arias<sup>1</sup>, Tapio Mappes<sup>2</sup>, Timothy A. Mousseau<sup>3,7</sup>, Anders P. Møller<sup>4</sup>, Antonio Jesús Muñoz Pajares<sup>1</sup>, Cristina Garcia<sup>1</sup>, Marcin Piwczynski<sup>5</sup>, Eugene Tukalenko<sup>2,6</sup>

<sup>1</sup> CIBIO/InBIO, Research Center in Biodiversity and Genetic Resources, Associated Laboratory of the University of Porto, Vairão, PT-4485–661 Vairão, Portugal

<sup>2</sup> Department of Biological and Environmental Science, P.O. Box 35, FI-40014 University of Jyväskylä, Finland

<sup>3</sup> Department of Biological Sciences, University of South Carolina, Columbia, SC 29208, USA

<sup>4</sup> Laboratoire d'Ecologie, Systématique et Evolution, CNRS UMR 8079, Université Paris-Sud, Bâtiment 362, F-91405 Orsay Cedex, France

<sup>5</sup> Chair of Ecology and Biogeography, Nicolaus Copernicus University, Lwowska 1, PL-87-100 Toruń, Poland

<sup>6</sup> Institute of Biology, Taras Shevchenko National University of Kyiv, UA-03022 Kyiv, Ukraine

<sup>7</sup> Department of Environmental Biology, Chubu University, Kasugai, Aichi 487-8501, Japan

Table S1. Results from hand dosimeter substrate measures and gamma dosimetry soil, plant and root measurements.

|                                       | Mean     | SD       |
|---------------------------------------|----------|----------|
| Substrate radiation $\mu\text{Sv/h}$  | 5.64     | 7.55     |
| Soil radionuclide exposure Bq/kg      | 23296.24 | 28691.02 |
| Plant radionuclide accumulation Bq/kg | 730.08   | 971.68   |
| Root radionuclide accumulation Bq/kg  | 1480.67  | 2068.41  |

Table S2. Ionizing radiation in the location of maternal plant collection and the number of germinated seeds per plant.

| Maternal plant | Radiation ( $\mu\text{Gy/h}$ ) | Germinated seeds |
|----------------|--------------------------------|------------------|
| 1              | 6.10                           | 1                |
| 2              | 3.60                           | 2                |
| 3              | 3.44                           | 17               |
| 4              | 5.39                           | 14               |
| 5              | 4.42                           | 0                |
| 6              | 0.50                           | 11               |
| 7              | 0.50                           | 15               |
| 8              | 0.50                           | 18               |
| 9              | 0.51                           | 20               |
| 10             | 0.40                           | 15               |
| 11             | 0.30                           | 19               |
| 12             | 0.30                           | 14               |
| 13             | 0.30                           | 19               |
| 16             | 21.40                          | 18               |
| 17             | 21.63                          | 16               |
| 18             | 25.78                          | 6                |
| 19             | 28.30                          | 12               |
| 20             | 30.20                          | 15               |
| 21             | 0.17                           | 19               |
| 22             | 0.16                           | 17               |
| 23             | 0.19                           | 17               |
| 24             | 0.17                           | 20               |
| 25             | 0.17                           | 19               |
| 26             | 0.67                           | 18               |
| 27             | 1.02                           | 20               |
| 28             | 1.10                           | 18               |
| 29             | 1.05                           | 19               |
| 30             | 0.50                           | 16               |
| 31             | 0.14                           | 20               |
| 32             | 0.10                           | 20               |
| 33             | 0.08                           | 18               |
| 34             | 0.15                           | 13               |
| 35             | 0.14                           | 17               |

Table S3. Mixed model results (based on Laplace approximation) of the effects of ionizing radioactive contamination and seed mass (and earlier stages of development) on various subsequent developmental stages of wild carrots collected as seeds from the Chernobyl Exclusion Zone and grown in a greenhouse. Reduced results are presented in Table 1. The significance levels of effects were estimated with log likelihood ratio test (pLLRT).

| Dependent variables            | Model Log-Likelihood | Effect                    | Estimate | SE     | value  | pLLRT      |
|--------------------------------|----------------------|---------------------------|----------|--------|--------|------------|
| Germination                    | -273.3               | Radiation                 | -1.2321  | 0.001  | -949.7 | 0.0019     |
| Germination time               | -1436.1              | Radiation                 | 0.0773   | 0.023  | 3.37   | 0.0011     |
|                                |                      | Seed mass                 | 0.2867   | 0.129  | 2.22   | 0.026      |
| Cotyledon emergence            | -1111.3              | Germ. time                | 1.9236   | 0.0257 | 74.85  | <.00001    |
|                                |                      | Radiation                 | 0.0124   | 0.007  | 1.68   | 0.094      |
|                                |                      | Seed mass                 | 0.0777   | 0.043  | 1.81   | 0.080      |
| 1 <sup>st</sup> leaf emergence | -969.6               | Germ. time                | -1.2934  | 0.422  | -3.06  | NA         |
|                                |                      | Cotyledon                 | 2.5703   | 0.383  | 6.72   | NA         |
|                                |                      | Seed mass                 | 0.2842   | 0.284  | 1.00   | NA         |
|                                |                      | Germ.* Mass               | -1.5877  | 0.419  | -3.79  | 0.0003**   |
|                                |                      | Cot.* Mass                | 1.0665   | 0.385  | 2.77   | 0.0091     |
| 2 <sup>nd</sup> leaf emergence | -917.3               | 1 <sup>st</sup> leaf      | -0.0056  | 0.416  | -0.01  | NA         |
|                                |                      | Cotyledon                 | 1.8946   | 0.372  | 5.10   | NA         |
|                                |                      | Germination               | 0.1023   | 0.050  | 2.04   | NA         |
|                                |                      | Radiation                 | 0.2066   | 0.057  | 3.59   | NA         |
|                                |                      | Seed mass                 | 0.1730   | 0.277  | 0.63   | NA         |
|                                |                      | 1 <sup>st</sup> l. * Rad. | -0.3069  | 0.061  | -5.00  | <.00001*** |
|                                |                      | 1 <sup>st</sup> l. * Mass | -1.5246  | 0.398  | -3.84  | 0.0109     |
|                                |                      | Cot.* Mass                | 1.5658   | 0.360  | 4.35   | 0.0024*    |
|                                |                      | Germ.* Rad.               | 1.1183   | 0.058  | 2.03   | 0.0437     |
|                                |                      | Mass * Rad.               | -0.0591  | 0.025  | -2.36  | 0.0215     |
| 3 <sup>rd</sup> leaf emergence | -926.3               | Germ. time                | 0.1082   | 0.043  | 2.50   | 0.0132     |
|                                |                      | 1 <sup>st</sup> leaf      | 0.4490   | 0.083  | 5.43   | <.00001*** |
|                                |                      | 2 <sup>nd</sup> leaf      | 1.3824   | 0.084  | 16.43  | <.00001*** |
| 4 <sup>th</sup> leaf emergence | -881.2               | 1 <sup>st</sup> leaf      | -0.0214  | 0.068  | -0.31  | NA         |
|                                |                      | 2 <sup>nd</sup> leaf      | 0.2325   | 0.085  | 2.73   | NA         |
|                                |                      | 3 <sup>rd</sup> leaf      | 1.9047   | 0.090  | 21.25  | <.00001*** |
|                                |                      | Radiation                 | -0.0813  | 0.075  | -1.08  | NA         |
|                                |                      | 1 <sup>st</sup> l. * Rad. | -0.2135  | 0.082  | -2.59  | 0.011      |
|                                |                      | 2 <sup>nd</sup> l. * Rad. | 0.2486   | 0.087  | 2.84   | 0.005*     |
| 5 <sup>th</sup> leaf emergence | -890.9               | 3 <sup>rd</sup> leaf      | 0.6107   | 0.099  | 6.17   | <.00001*** |
|                                |                      | 4 <sup>th</sup> leaf      | 1.6724   | 0.098  | 17.02  | <.00001*** |
|                                |                      | Radiation                 | -0.0077  | 0.003  | -2.67  | 0.0076*    |
| 6 <sup>th</sup> leaf emergence | -802.0               | 1 <sup>st</sup> leaf      | -0.1867  | 0.066  | -2.82  | NA         |

|                                |        |                           |         |       |       |            |
|--------------------------------|--------|---------------------------|---------|-------|-------|------------|
|                                |        | 4 <sup>th</sup> leaf      | 0.3833  | 0.131 | 2.92  | 0.0090     |
|                                |        | 5 <sup>th</sup> leaf      | 1.7129  | 0.119 | 14.35 | <.00001*** |
|                                |        | Radiation                 | -0.3048 | 0.087 | -3.50 | NA         |
|                                |        | 1 <sup>st</sup> l. * Rad. | 0.2355  | 0.069 | 3.44  | 0.0007**   |
| 7 <sup>th</sup> leaf emergence | -433.1 | 3 <sup>rd</sup> leaf      | -0.1063 | 0.119 | -0.89 | NA         |
|                                |        | 6 <sup>th</sup> leaf      | 3.0479  | 0.249 | 12.24 | NA         |
|                                |        | Radiation                 | -0.4946 | 0.179 | -2.76 | NA         |
|                                |        | Seed mass                 | -2.5465 | 0.386 | -6.60 | NA         |
|                                |        | 3 <sup>rd</sup> l. * Rad. | 0.3349  | 0.123 | 2.72  | 0.0098     |
|                                |        | 6 <sup>th</sup> l. * Mass | 1.5454  | 0.236 | 6.55  | 0.0266     |

Values - "z" for Germination model assuming logit link function, "t" for the rest of the models assuming log link function. NA - part of higher-order interaction, LLRT skipping term. Terms significant after applying Bonferroni correction for multiple separate tests for 7 leaves: \*\*\* <.00001, \*\* .00001-0.01, \* 0.01-0.05.

### Supplementary Figure:

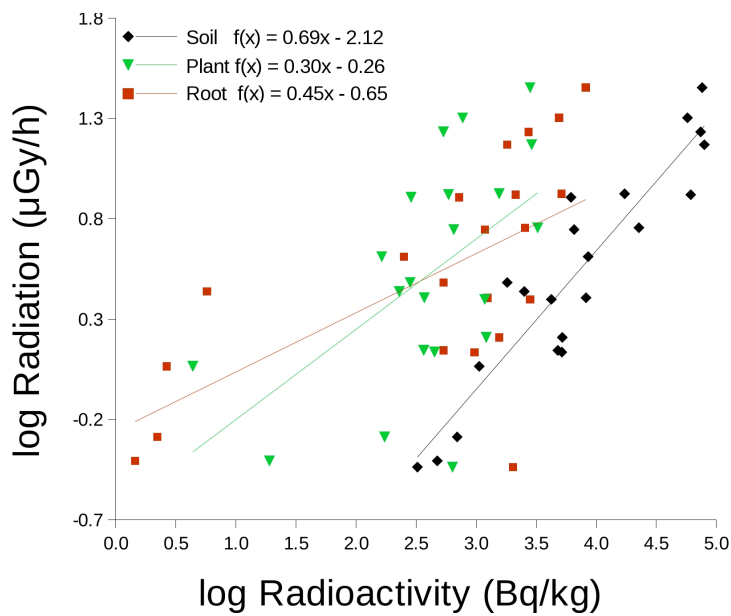

Figure S1. Correlations between hand-held dosimeter measures (log transformed, Radiation) and soil, plant (above ground parts) and root radioactive dose exposure and uptake in carrots (log transformed, Radioactivity).
